1 **Title:** Predictability of adaptive evolution under the successive fixation assumption

2 Sandeep Venkataram, Diamantis Sellis, Dmitri A. Petrov

3 *Department of Biology, Stanford University, Stanford, CA 94305*

4 **Running Title:** Predictability of Evolution

5 **Key Words:** heterozygote advantage, fitness landscape, selection, population genetics

6 **Corresponding Author:**

7 Dmitri A. Petrov

8 Stanford University Department of Biology

9 371 Serra Mall Stanford CA 94305

10 (650) 736 1169

11 dpetrov@stanford.edu

12

## ABSTRACT

13 Several recent experimental studies assessed the likelihood of all possible evolutionary  
14 paths between ancestral and evolved sequences. All of these studies measured the fitness of  
15 the intermediate genotypes and assumed that the advantageous genotypes fix in the  
16 population before acquiring the next adaptive mutation along the path. Unfortunately, the  
17 successive fixation assumption used by these studies is typically invalid, given that natural  
18 selection often maintain alleles at intermediate frequency by a variety of mechanisms such  
19 as frequency-dependent selection, local adaptation, clonal interference, and fitness  
20 overdominance. Here we simulate adaptive walks using Fisher's geometric model in diploid  
21 populations where previous work has shown that adaptation commonly generates balanced  
22 polymorphisms through overdominant mutations. We use these simulations to show that  
23 the use of the successive fixation assumption in this simple model is largely justified if the  
24 goal is to separate viable and inviable paths from each other. However, the estimates of the  
25 relative likelihoods of the viable paths become unreliable. We also show that the presence  
26 of balanced states along the true path significantly affects the number and likelihood  
27 distribution of viable paths when compared to walks without balanced states. These simple  
28 simulations highlight the importance of considering the effect of polymorphisms during  
29 adaptation especially given the prevalence of functional polymorphisms in natural  
30 populations.

31

## INTRODUCTION

32 Predicting evolution is one of the fundamental challenges of evolutionary biology (reviewed  
33 in DE VISSER and KRUG (2014)). This question became particularly prominent with  
34 Gould’s famous thought-experiment on “replaying the tape of life” (GOULD 1990), which  
35 asks how different our evolutionary history would have been if we could rerun evolution  
36 from some point in the past. We call this “forward predictability”, or the predictability of  
37 the future evolutionary trajectory of a population from a given starting condition. Perhaps  
38 the best known study of forward predictability is a set of 12 parallel *Escherichia coli*  
39 lineages that have been experimentally evolving for over 50,000 generations (WISER *et al.*  
40 2013). These experiments showed that replicate independent evolution experiments  
41 frequently acquired similar adaptive mutations and experienced similar gains in fitness over  
42 the course of evolution (CROZAT *et al.* 2010; WISER *et al.* 2013), suggesting that evolution  
43 can be forward predictable to a surprising degree.

44 Recently, a number of experiments have instead focused on inferring past evolutionary  
45 history (backward predictability) given knowledge of both the ancestral state of the  
46 population and a set of adaptive mutations. The purpose of this method, which we call  
47 backward predictability inference, is to infer the relative likelihood of the different possible  
48 orders in which these specific adaptive mutations could have occurred. One of the earliest  
49 studies of backward predictability inference was done by WEINREICH *et al.* (2006) based on  
50 a combinatorially complete reverse genetic study design pioneered by MALCOLM *et al.*  
51 (1990). WEINREICH *et al.* (2006) reconstructed all 32 possible combinations of 5 mutations  
52 in the beta-lactamase gene in *E. coli*, which are known to confer resistance to the drug  
53 rifampicin. They then quantitatively assayed the drug resistance of these 32 genotypes as a  
54 proxy for fitness, and used this information to analyze all  $5! = 120$  possible trajectories  
55 (orders in which the 5 mutations could occur) from the ancestral to the resistant  
56 five-mutation genotype. A mutational path was deemed viable if resistance monotonically

57 increased with every mutational step. By this definition, WEINREICH *et al.* (2006) found  
58 that only 18 of the 120 possible paths were viable and even fewer were highly likely,  
59 suggesting that there is substantial constraint in evolutionary trajectories that renders  
60 evolution highly predictable.

61 A handful of other studies using backward predictability inference have also suggested that  
62 evolution may be constrained to follow a few evolutionary paths. FRANKE *et al.* (2011)  
63 conducted backward predictability inference in all subsets of two to six mutations in an  
64 empirical eight-locus system of phenotypic marker mutations in *Aspergillus niger* and  
65 observed that different subsets of mutations had very different predictabilities. For  
66 example, they observed both zero and nine viable paths (out of 24 possible) in different  
67 four-mutation subsets. In addition, BUENROSTRO *et al.* (2014) studied an empirical  
68 RNA-protein binding landscape and found that only a few mutation orders were viable in  
69 various four-mutation subsets of the landscape, suggesting that this system is fairly  
70 backward predictable. All of these studies also computed the likelihood of each viable  
71 trajectory and found that only a few of these viable trajectories had a high likelihood.

72 The previous examples conducted backward predictability inference by surveying  
73 mutations of known function, or simply by sampling a large fraction of the possible  
74 sequence space through synthesis of random sequences. Another method is to use  
75 comparative genomics to infer the ancestral state of a protein (YANG *et al.* (1995); HALL  
76 (2006), reviewed in THORNTON (2004); HARMS and THORNTON (2010)) and attempt to  
77 reconstruct the adaptive trajectory between the ancestral and derived states. BRIDGHAM  
78 *et al.* (2006) conducted such a study using ancestral protein reconstruction of the  
79 aldosterone binding protein MR. After identifying a few functional mutations that  
80 differentiated the ancestral protein from the derived one using comparative genomic  
81 methods, the authors tested various intermediate genotypes for protein function. Along

82 with a follow up study (ORTLUND *et al.* 2007), the authors found that some intermediate  
83 states generated nonfunctional proteins, which they suggest constrained evolution to one of  
84 the few adaptive trajectories with non-deleterious intermediate states.

85 In contrast to these results, KHAN *et al.* (2011) performed an analysis of five adaptive  
86 mutations from experimentally evolved bacterial lineages using identical methodology and  
87 found that a majority of the mutational orders were viable. While backward predictability  
88 inference shows great promise in predicting evolution, we still need to understand how  
89 much predictability can vary across experimental systems. We also lack a sufficient number  
90 of gold-standard data sets to determine the utility of backward predictability inference in  
91 identifying either inviable mutation orders or the true adaptive trajectory.

92 **Polymorphism in adaptive walks:** A common assumption in all of these studies is that  
93 each putatively adaptive mutation fixes successively in a monomorphic population  
94 (GILLESPIE 1983, 1984; ORR 2002; BRIDGHAM *et al.* 2006; WEINREICH *et al.* 2006;  
95 ORTLUND *et al.* 2007; KHAN *et al.* 2011; FRANKE *et al.* 2011). This is clearly a major  
96 simplification for natural populations, since all natural populations are polymorphic.  
97 Beyond neutral polymorphisms that can be generated by genetic drift, genetic draft and  
98 admixture, we know that adaptive mutations can be maintained in a polymorphic state  
99 through the actions of natural selection. This can occur through negative  
100 frequency-dependent selection (LEVIN *et al.* 1988; ISERBYT *et al.* 2013), spatial and  
101 temporal fluctuations in selection (RAINEY and TRAVISANO 1998; KASUMOVIC *et al.* 2008;  
102 BERGLAND *et al.* 2014; SALTZ and NUZHIDIN 2014) and heterozygote advantage (also  
103 called overdominance, TAKAHATA and NEI (1990)).

104 Backward predictability inference using the successive fixation assumption (FA method) is  
105 far easier to implement in practice than when polymorphisms are considered (PA method),

106 which is why the FA method has been used for all previous experimental studies. For the  
107 FA method, one only needs to assay the fitness of the  $2^n$  possible genotypes in a system of  
108  $n$  mutations (32 for  $n=5$ ), and then infer the likelihood of every possible trajectory based  
109 on these fitness estimates. This could be further approximated by measuring a parameter  
110 related to fitness, such as the maximal growth rate of the organism. However, since  
111 polymorphisms are possible in the PA method, the marginal fitness of an allele is no longer  
112 independent of the other alleles present in the population. Therefore, the PA method  
113 requires one to directly test the successful invasion and stabilization of each new mutation  
114 in each of the possible adaptive trajectories. However, despite the challenges in  
115 implementation, the PA method may be necessary in systems where functional  
116 polymorphisms are frequently generated and maintained.

117 Beyond influencing the implementation of backward predictability inference, it is unknown  
118 whether the presence of polymorphic states systematically changes the backward  
119 predictability of evolution. We therefore want to study adaptive trajectories with and  
120 without polymorphic states to answer this question.

121 **Predictability in Fisher's Geometric Model:** Overall, there seems to be no  
122 experimental consensus on whether evolution is backward predictable using the method of  
123 WEINREICH *et al.* (2006), and there is no experimental work on the impact of  
124 polymorphisms on backward predictability. Furthermore, the accuracy of backward  
125 predictability inference remains unknown. First, we do not know whether inferred  
126 trajectories that are deemed to be inviable are truly impossible. Second, it is unclear  
127 whether the likelihood estimate of an inferred trajectory, given that it is viable, accurately  
128 represents the probability that the population adapted along that trajectory. Finally, it is  
129 unknown how much improvement there will be in the inference procedure when we relax  
130 the successive-fixation assumption of prior studies and allow for stable polymorphic states

131 in systems where stable polymorphisms are frequently generated.

132 Due to the challenges of isolating sufficient numbers of independent adaptive trajectories  
133 from experimental populations, we utilize a simulation-based approach to study the  
134 accuracy and the impact of polymorphisms on backward predictability inference. A  
135 simulation framework also gives us perfect information about the true adaptive trajectory  
136 of the population so that we can conduct extensive validation of backward predictability  
137 inference. We employ Fisher's geometric model (FGM, FISHER (1930); ORR (1999, 2005))  
138 to conduct forward simulations of adapting populations. FGM is a simple phenotypic  
139 model where individuals have phenotypes defined as points in n-dimensional space. A  
140 simple fitness function is then used to map phenotypes into fitness. SELLIS *et al.* (2011)  
141 showed that adaptive mutations in diploid FGM simulations are frequently overdominant  
142 (exhibit heterozygote advantage) if the mutations are sufficiently large in phenotype space,  
143 resulting in balanced polymorphisms. These overdominant mutations are temporarily  
144 stable, but they can be driven out of the population by subsequent adaptive mutations.  
145 The simple nature of the model allows for a straightforward analysis procedure to study  
146 predictability. In addition, any evidence that the successive fixation assumption fails in this  
147 model would imply that it could easily fail in more realistic biological systems.

148 In this work, we simulate a large number of independent adaptive trajectories using FGM  
149 in three different parameter regimes, which we use to study the accuracy of the FA and PA  
150 methods. We then study the impact of stable polymorphisms on backward predictability in  
151 all three parameter regimes.



## RESULTS

152

153 We generated adaptive trajectories using Wright-Fisher simulations with Fisher's geometric  
154 model in three parameter regimes, the first of which is a two dimensional regime with a  
155 poorly adapted initial population that is far from the optimum (2D-far regime,  
156 Supplementary Text ST1.1). We simulated diploid populations with a population size  
157  $N=5000$  and mutation rate  $\mu = 5 * 10^{-6}$  per generation, with 10,000 replicate simulations  
158 (ST1.2). The low per-generation mutation rate allowed us to use the strong-selection  
159 weak-mutation assumption for our analysis to consider each mutation by itself. For all of  
160 our statistical analyses, we considered only those mutations that are present on the most  
161 frequent allele at generation 10,000. We additionally limited our analysis to the first five  
162 mutations of each adaptive walk, and ignored simulations with fewer than five mutations in  
163 order to compare adaptive walks of equal lengths. This is comparable to many recent  
164 studies utilizing backward predictability inference (backward predictability inference)  
165 (WEINREICH *et al.* 2006; KHAN *et al.* 2011; FRANKE *et al.* 2011). For simplicity,  
166 simulations that generated balanced states containing three or more alleles were removed  
167 from the analysis ( $n = 1099$ ). We first used the remaining simulations to test the accuracy  
168 of the FA and PA methods. We then partitioned the simulations into those that do  
169 ( $n = 4210$ ) and do not ( $n = 872$ ) contain overdominant mutations to study the impact of  
170 balanced polymorphisms on the backward predictability of evolution (ST1.3). We tested  
171 the generality of our observations in 25-dimensional space with a poorly adapted initial  
172 population (25D-far regime) as well as 2-dimensional space with a well-adapted initial  
173 population (2D-close regime). Unless otherwise specified, all of our results described in the  
174 main text are for the 2D-far regime.

175 **Impact of overdominant mutations on forward predictability:** SELLIS *et al.* (2011)  
176 found that overdominant mutations in FGM allow populations to explore a much larger  
177 portion of phenotype space than populations without such mutations. Therefore,

178 overdominant mutations should increase the phenotypic divergence between independent  
179 adaptive walks and thus decrease the forward predictability of evolution. To validate this  
180 with our simulations, we computed the maximum phenotypic distance of each simulated  
181 adaptive walk from the line segment connecting the ancestral and optimal phenotypes (i.e.  
182 the optimal adaptive trajectory) for simulations with and without overdominant mutations  
183 (Figure S1). We found that overdominant mutations significantly increase the deviation of  
184 an adaptive trajectory from the optimal trajectory, thus decreasing forward predictability  
185 and supporting the work of SELLIS *et al.* (2011).

186 **Conducting backward predictability inference:** We conducted backward  
187 predictability inference in a manner similar to WEINREICH *et al.* (2006) (implementation  
188 details in ST2.1) both with and without the successive fixation assumption (the FA and PA  
189 methods, respectively). Our analysis conditions on the first five mutations that occurred  
190 during a given FGM simulation and computes the relative likelihood of each of the  $5! =$   
191 120 possible orders of generating the adapted allele containing all five mutations (e.g. see  
192 WEINREICH *et al.* (2006) Figure 2). This was done with a recursive procedure that  
193 successively added the five mutations into the ancestral population in every possible order  
194 until the allele containing all five mutations was generated. We computed the  
195 unconditioned likelihood of a mutation order as the product of the probabilities of each  
196 mutation occurring on the appropriate genetic background and then successfully invading  
197 the population, and then normalized the unconditioned likelihood across all viable  
198 mutation orders to compute the relative likelihood. Please see ST2.6 for a detailed example  
199 of this algorithm.

200 **Validating the backward predictability inference method:** We validated the FA  
201 and PA methods by using our knowledge of the order in which these five mutations  
202 actually occurred in the FGM simulation (from now on, “the true adaptive trajectory”),

203 similar to the validation methodology of (OGDEN and ROSENBERG 2006; LI *et al.* 2008;  
204 MESSER and PETROV 2013; BERTELS *et al.* 2014) and others. We eliminated, on average,  
205 46% of the possible trajectories as they were inferred to be inviable (inferred trajectory  
206 probability = 0) using the FA method and 44% using the PA method. 97% of inferred  
207 inviable trajectories were inviable in both the FA and PA methods, while the rest were  
208 inferred to be inviable with only one of the methods. In  $\sim 0.7\%$  of simulations with both  
209 the FA and PA methods, the true adaptive trajectory was eliminated by the inference  
210 analysis as inviable. Therefore, just by eliminating inviable trajectories, both the FA and  
211 PA methods greatly improve our ability to determine the true adaptive trajectory with a  
212 very low false negative rate.

213 Our implementations of the FA and PA methods use a diploid model, where new mutations  
214 must successfully invade the population as heterozygotes. We consider a further  
215 simplification of the FA model to exactly match the work of WEINREICH *et al.* (2006),  
216 where we force new mutations to invade as homozygotes. We find that this results in a  
217 much higher (15%) false negative rate where true adaptive trajectories are mistakenly  
218 classified as inviable, so we do not consider this method for future analysis.

219 We assessed the accuracy of the FA and PA methods in two different ways. First, we  
220 compared the inferred probabilities for the trajectories predicted to be viable (ST2.2) to  
221 empirical estimates of their probability. For every set of five mutations, we conducted 1000  
222 further forward Wright-Fisher FGM simulations while restricting the available set of  
223 mutations to those five mutations. We estimated the true likelihood of every possible  
224 mutation order as the frequency with which that mutation order occurred in the 1000  
225 additional simulations. We found that the likelihoods inferred by both the FA and PA  
226 methods were significantly correlated with the true likelihoods (Figure 1), but the PA  
227 method was significantly better correlated with the true likelihoods than the FA method

228 (ANOVA  $p < 10^{-10}$ ). In addition, we observe that the FA method both overestimates the  
229 likelihood of some highly unlikely mutation orders and underestimates the likelihood of  
230 some mutation orders with higher empirical likelihood. The PA method, in contrast, only  
231 appears to have some problems overestimating highly unlikely mutation orders. Therefore,  
232 the PA method matches the empirical likelihood estimates better than the FA method.

233 Our second assessment of accuracy was to test how informative these probabilities are in  
234 identifying the true adaptive trajectory. For both the FA and PA methods, we sorted all  
235 viable trajectories across all FGM simulations by their inferred probability and binned  
236 them into 100 bins. If the FA and PA methods work perfectly, we could expect a 1:1  
237 relationship between the average trajectory probability for each bin and the fraction of the  
238 trajectories in that bin that match the mutation order of the true adaptive trajectory. If  
239 the inference method is not useful at all, we expect that there is no relationship between  
240 the two. We found that the trajectory probabilities for each bin were positively correlated  
241 with the fraction of the trajectories in that bin that were in fact observed in the original  
242 FGM simulations with both the FA and PA methods. The relationship was again weaker  
243 with the FA method than the PA method (FA slope = 0.49, PA: slope = 0.57, Figure 2).

244 We now wanted to know whether the inferred trajectory probabilities were better able to  
245 identify the true adaptive trajectory than random chance. Note that a positive slope is  
246 expected even if the FA and PA methods do not provide any information beyond removal  
247 of inviable lineages. Indeed, simulations where there are only a few viable trajectories will  
248 have, on average, a higher probability for each viable trajectory than those with many  
249 viable trajectories, and each of these viable trajectories are also more likely to be chosen as  
250 the true trajectory in a randomization since there are fewer of them. We tested whether  
251 our observed slope is greater than expected through 1000 randomizations of the data,  
252 where for each randomization, one viable trajectory in each simulation was randomly

253 assigned to be the true adaptive trajectory and the slope was recomputed as before. We  
254 found that both the FA and PA methods perform better than randomized data (FA and  
255 PA empirical  $p < 0.001$ ; Figure 2, dashed lines compared to shaded areas).

256 **Simulations in high dimensionality:** In our implementation of Fisher’s Model,  
257 balanced states arise when mutations are overdominant. The presence of additional  
258 phenotypic dimensions, which seems realistically plausible from observed rates of pleiotropy  
259 (DUDLEY *et al.* 2005; ALBERT *et al.* 2008), increases the fraction of new mutations that  
260 generate overdominant alleles (SELLIS *et al.* 2011). However, this concordantly decreases  
261 the fitness advantage of the average new beneficial mutation, decreasing the number of  
262 adaptive mutations that successfully invade the population over our 10,000 generation  
263 FGM simulations. To study the impact of high dimensional landscapes on backward  
264 predictability, we conducted simulations using 25 dimensions with a mean mutation size of  
265 5 (25D-far regime). The increase in mean mutation size, relative to our original two  
266 dimensional simulations, was necessary to generate a sufficient number of walks containing  
267 at least five mutations within 10,000 generations. We again partitioned the simulations  
268 into those with ( $n = 288$ ) and without ( $n = 203$ ) overdominant mutations and analyzed the  
269 backward predictability of the trajectories as before. We found that the FA and PA  
270 methods remove 17% and 16% of the inferred trajectories as inviable, respectively. Both  
271 methods also have very low false negative rates in inferring true adaptive trajectories as  
272 inviable (FA method 0.6%, PA method 1.4%). Consistent with previous results, the PA  
273 method performs significantly better than the FA method in accurately inferring the  
274 likelihood of a trajectory (Figure S2). Unlike our previous results, the slope computed with  
275 the FA method when comparing the likelihood of a set of binned trajectories to the  
276 fraction of those trajectories that are true (Figure S3) is not significantly better than  
277 randomizations (empirical  $p = 0.733$ ), suggesting that the FA method is not useful in this  
278 high dimensional space beyond removing inviable trajectories. The PA method, in contrast,

279 is still significantly better than random chance in this regime (empirical  $p = 0.009$ ).

280 **Simulations close to the optimum:** The Gaussian fitness surface was originally used to  
281 provide an approximation for populations close to their fitness optimum (LANDE 1976),  
282 while our initial two parameter regimes had the ancestral population far from the  
283 optimum. We thus ran additional simulations in two dimensions where the population was  
284 initialized close to the optimum by modifying the fitness function (2D-close regime, ST1.1).  
285 We generated a large number of 5-step adaptive walks ( $n = 649$  and  $234$ , respectively for  
286 simulations with and without overdominant mutations) and tested the accuracy and utility  
287 of the FA and PA methods as before (Figures S6-S7). Both methods remove a substantial  
288 fraction of the inferred trajectories as inviable (FA  $\sim 44\%$ , PA  $42\%$ ), with a low false  
289 negative rate (FA  $1.2\%$ , PA  $1.0\%$ ). The PA method is better correlated to the empirical  
290 probability estimates than the FA method (Figure S6, ANOVA  $p < 10^{-10}$ ). However,  
291 neither method does better than random chance at identifying the true adaptive trajectory  
292 (Figure S7).

293 Across all parameter regimes, both the PA and FA methods are able to accurately identify  
294 inviable trajectories with a low false positive rate. However, the PA method has  
295 significantly higher accuracy in inferring the probability of a trajectory than the FA  
296 method in all regimes when compared to empirical estimates of trajectory probabilities  
297 (Figures 1, S2, S6). In addition, the PA method does better than the FA method at  
298 identifying the true trajectory in all regimes through the binning method. Unlike the PA  
299 method, the FA method fails to do better than random chance at identifying the true  
300 adaptive trajectory in the 25D-far regime, while both fail to do better than random chance  
301 in the 2D-close regime. The FA method is thus only reliable for identifying inviable  
302 trajectories but not for inferring their likelihoods. Therefore, we use the PA method for the  
303 remainder of our analysis.

304 **Impact of overdominant mutations on backward predictability inference:** Since  
305 we have shown that the PA method can accurately infer the probability of an adaptive  
306 trajectory, we utilized this method to study the impact of overdominant mutations on the  
307 backward predictability of adaptive trajectories. In particular, we are interested in testing  
308 whether backward predictability as inferred by the PA method is consistent with the  
309 previous results that forward simulations with overdominant mutations are less forward  
310 predictable than simulations without overdominant mutations (SELLIS *et al.* 2011). For all  
311 of these analyses, we identified simulations that do and do not contain overdominant  
312 mutations and analyzed them separately (ST1.3). As before, all of our results are for the  
313 2D-far regime unless stated otherwise.

314 We first study backward predictability in terms of the likelihoods of the different mutation  
315 orders. We compute the effective number of paths for each set of five mutations by  
316 weighting the number of viable paths found by their likelihoods (ST2.3). We found that  
317 the presence of overdominant mutations increased backward predictability in a walk by  
318 31%, on average, when compared to simulations that lack overdominant mutations (Figure  
319 3, Kolmogorov-Smirnov  $p < 10^{-10}$ ). A similar statistic (mean path divergence,  
320 LOBKOVSKY *et al.* (2011)) also found that overdominant mutations resulted in walks that  
321 were 11% more backward predictable (Kolmogorov-Smirnov  $p < 10^{-10}$ ). We found similar  
322 results in our other two regimes as well (Figures S4, S8). In other words, compared to an  
323 adaptive trajectory without overdominant mutations, it is more probable that independent  
324 evolutions experiencing at least one overdominant mutation will use the same mutational  
325 order. These results are in contrast with the previous result that overdominant mutations  
326 make adaptation less forward predictable (Figure S1, SELLIS *et al.* (2011)).

327 While the effective number of paths and mean path divergence statistics capture the  
328 backward predictability of the mutational order, we can also consider the similarity of the

329 inferred trajectories with the wrong mutation order to the true trajectory in phenotype  
330 space (ST2.4). Simulations with overdominant mutations are 7% less phenotypically  
331 similar than simulations without such mutations in the 25D-far regime  
332 (Kolmogorov-Smirnov  $p = 0.001$ ) but there is no significant difference between the two  
333 types of walks observed in the 2D-far or 2D-close regimes. However, in all parameter  
334 regimes, simulations with overdominant mutations are less phenotypically similar to the  
335 true adaptive trajectory than simulations without overdominant mutations. This is in  
336 contrast to the results looking at the backward predictability of mutation order where  
337 simulations with overdominant mutations were more predictable in all regimes.

338 We then wanted to test whether there was any relationship between the likelihood of a  
339 trajectory and its phenotypic deviation from the true trajectory. We compared the  
340 phenotypic deviation of each inferred trajectory against the probability of the inferred  
341 trajectory, and found a significantly negative regression slope (Figure 4a, slope =  $-0.50$ ,  
342  $p < 10^{-10}$ ). This suggests that trajectories with high inferred probability but different  
343 mutation orders have similar phenotypic paths to the optimal trajectory. We compared this  
344 slope to slopes from 100 randomizations, where we randomly selected a viable mutation  
345 order to be the true trajectory. For each randomization, we recomputed the phenotypic  
346 deviations and found that the observed slope was more extreme than the slope of every  
347 randomized trial (Figure 4b, empirical  $p < 0.01$ ). The significance of the slope suggests that  
348 even if backward predictability inference generates incorrect mutation orders with high  
349 probability, the inferred trajectory may still be a good phenotypic approximation for the  
350 true evolutionary history of the population. This significant reduction in slope compared to  
351 randomized data also holds for the 25D-far and 2D-close regimes (Figures S5, S9).

352 **Multiple adapted states:** We now turn to the first of two qualitatively novel features we  
353 uncovered while using the PA method. Backward predictability inference using the PA



354 method generates different intermediate alleles by introducing mutations in different  
355 orders. It is thus possible that the adapted allele containing all of the available mutations  
356 may be stably balanced against some of these intermediate alleles, but not others.  
357 Therefore, by introducing mutations in different orders, it may be the case that the final  
358 adapted allele is maintained as a stable polymorphism with different intermediate alleles in  
359 different mutational orders, or not maintained in a balanced state at all (Figure 5a).

360 We found that backward predictability inference frequently generated at least two different  
361 population states containing the final adapted allele when the mutations are introduced in  
362 different orders, with a maximum of 14 different population states for a single set of five  
363 mutations. In addition, the presence of an overdominant mutation in the observed walk  
364 increased the frequency of multiple adapted states from 40% to 55%. We also observed that  
365 88% of the walks that did not experience balanced states in the FGM simulations generated  
366 at least one balanced state in some viable mutation order while using the PA method.  
367 Multiple end states were also observed in 67% and 57% of all simulations in the 25D-far  
368 and 2D-close regimes, respectively, suggesting that this is a general feature of our model.

369 **Hidden alleles:** In the course of our validation analysis, we were struck by the presence of  
370 simulations where the true adaptive trajectory was inferred to be inviable. Although 9 of  
371 these 35 simulations appear to be impossible to reconstruct due to clonal interference, we  
372 found that the remaining 26 contain derived alleles that reached high frequency through a  
373 balanced state but were eventually lost, which we term “hidden” alleles (Figure 5b). We  
374 hypothesized that in these 26 simulations, hidden alleles were necessary for the true  
375 trajectory to be viable, such that attempts to reconstruct the order of mutations using the  
376 PA method without including the hidden alleles would fail to recover the true adaptive  
377 trajectory. To test this, we selected one of these 26 simulations at random to rerun the PA  
378 method while including all hidden alleles in the inference. We successfully recovered the

379 true adaptive trajectory that had been previously impossible to reconstruct (data not  
380 shown), suggesting that hidden alleles can lead to significant errors in inference.

381 In general we found that 44% of all of our simulations contain at least one hidden allele  
382 (ST1.5). The vast majority of them (99%) are in simulations with overdominant  
383 mutations, as expected, since hidden alleles should only be able to reach high frequency  
384 when there is a balanced state. Hidden alleles in simulations without overdominant  
385 mutations appear to be the result of clonal interference. Given the high frequency of  
386 hidden alleles in our simulations, we tested whether they significantly impact the accuracy  
387 of the PA method, as in Figure 2. The slope for simulations without hidden alleles is 0.69,  
388 while the slope for simulations that do have hidden alleles is 0.59. While removing hidden  
389 alleles does increase the slope by 17%, this difference is non-significant (t-test  $p = 0.29$ ),  
390 suggesting that the presence of hidden alleles did not significantly influence the accuracy of  
391 the likelihood estimates for the inferred trajectories, except for the rare cases where the  
392 hidden alleles were necessary for the viability of the true adaptive trajectory. Hidden  
393 alleles were also observed in 33% of simulations in the 25D-far regime and 27% of  
394 simulations in the 2D-close regime, suggesting that this is a general feature of our system.

395

## DISCUSSION

396 In this work, we sought to answer two major questions. First, we wanted to know how  
397 polymorphisms impact backward predictability inference, and more generally, whether it is  
398 justified to assess the backward predictability of a trajectory by assuming successive  
399 fixation of mutations. Secondly, we wanted to investigate how predictability changes when  
400 comparing simulations with and without balanced polymorphisms. We use our results to  
401 interpret the many experimental studies using backward predictability inference that have  
402 been conducted, particularly the large variation in the number of viable trajectories.

403 **Lower accuracy of the FA method compared to the PA method:** When  
404 considering only whether or not a trajectory is viable, backward predictability inference  
405 both with (FA) and without (PA) the successive fixation assumption appear to do equally  
406 well at eliminating inviable trajectories with a low false-negative rate. However, the PA  
407 method is significantly more accurate than the FA method in all regimes when compared  
408 to empirically estimated probabilities from additional forward FGM simulations (Figures 1,  
409 S2, S6). The likelihoods estimated by the PA method appear to be more accurate than  
410 those from the FA method at identifying the true adaptive trajectory in all regimes as well  
411 (Figures 2, S3, S7, red dashed line compared to blue dashed line).

412 The lower accuracy of the FA method in estimating the likelihood of a trajectory when  
413 compared to the PA method results from two main consequences of using a diploid model.  
414 First, forcing an overdominant allele to fix when using the FA method reduces mean  
415 fitness, because overdominant alleles maximize mean fitness as stable polymorphisms. In  
416 some cases, mean fitness can actually decrease relative to the ancestral population.  
417 Therefore, certain mutational steps that confer marginal fitness benefits in the PA method  
418 can confer large fitness benefits in the FA method, due to the artificially reduced mean  
419 fitness of the population from the fixation of a prior overdominant mutation. Second, when

420 the PA method generates a balanced state, the likelihood of the next mutation in a  
421 particular mutation order is proportional to the frequency of the appropriate genetic  
422 background in that balanced state. This is irrelevant for the FA method, since every  
423 mutation is assumed to reach fixation. Therefore, mutational events that should be  
424 unlikely are not accounted for in the FA method.

425 One possible way to use the FA method and avoid the reduction in mean fitness is to use a  
426 haploid-like model where we only consider the fitness of homozygotes. However, we find  
427 that this version of the FA method results in a 15% false negative rate in the 2D-far  
428 regime. In addition, we still observe the systematic overestimation of mutation orders with  
429 low likelihoods found in the regular FA method (data not shown), suggesting that this is  
430 not an appropriate method for backward predictability inference.

431 **Differences between parameter regimes:** The usefulness of the inferred probabilities  
432 in detecting the true adaptive trajectory seems to be a function of the fitness of the  
433 ancestral population. The PA method does better than random chance at identifying the  
434 true adaptive trajectory in the 2-dimensional regime with a poorly adapted initial  
435 population that is phenotypically far from the optimum (2D-far regime) and the 25  
436 dimensional regime far from the optimum (25D-far regime), but not in the well-adapted 2D  
437 regime close to the optimum (2D-close regime). We suspect that when the population is  
438 initialized close to the optimum and thus already has high fitness, every adaptive mutation  
439 can only slightly improve fitness, so most viable mutation orders for an adaptive trajectory  
440 in this regime are equally likely, making it challenging to identify the true adaptive  
441 trajectory by its probability alone.

442 In addition to the poor accuracy of the FA method in the 2D-close regime, the FA method  
443 also does poorly in the 25D-far regime, suggesting that a high phenotypic dimensionality

444 limits the accuracy of backward predictability inference specifically under the fixation  
445 assumption. Prior work has shown that increasing phenotypic dimensionality in FGM  
446 increases the fraction of adaptive mutations that are overdominant (SELLIS *et al.* 2011),  
447 which are not accounted for with the FA method. This is likely what causes the poor  
448 accuracy of the FA method in the 25D-far regime.

449 We now test whether the poor accuracy of both the PA and FA methods in the 2D-close  
450 regime is due to the similar likelihoods of all viable trajectories. We compute the percentile  
451 rank of the true adaptive trajectory among all viable inferred trajectories for each  
452 simulation, and then compute the median across all simulations. A percentile rank of 0  
453 implies that the true adaptive trajectory has, on average, the lowest probability of all  
454 viable trajectories in that simulation, while a percentile rank of 100 means that it has the  
455 highest probability. A rank of 50 implies that the inferred probabilities are not useful in  
456 identifying the true adaptive trajectory. We find that the median percentile ranks for the  
457 PA method are 70 and 66 for the 2D-far and 25D-far regimes, respectively, but is only 60  
458 for the 2D-close regime, suggesting that the probabilities are less informative in identifying  
459 the true adaptive trajectory in this regime than the other regimes due to the true adaptive  
460 trajectory having a similar likelihood to many other viable trajectories.

461 We observe additional differences between our regimes when studying backward  
462 predictability in phenotype space. We only observe a significant difference in phenotypic  
463 similarity between simulations with and without overdominant mutations in the 25D-far  
464 regime, suggesting that the high dimensional regime is enhancing the phenotypic  
465 differences between these types of adaptive walks. In addition, both the 2D-far and 25D-far  
466 regimes have significantly negative slopes when comparing the phenotypic similarity of an  
467 inferred trajectory to its likelihood as computed by the PA method (Figure 4, S5).  
468 However, the 2D-close regime has a slope close to zero (Figure S9), again suggesting that

469 backward predictability inference on well-adapted populations is less informative in  
470 identifying the true adaptive trajectory than in poorly-adapted populations.

471 **Interpretation of experimental studies:** We can now compare the results of the PA  
472 method in our different parameter regimes to the previous results from natural systems.  
473 WEINREICH *et al.* (2006) found that only 15% of the possible trajectories were viable,  
474 while others found 0%, 38% and > 50% in various systems. In addition, FRANKE *et al.*  
475 (2011) found significant variability in the number of viable trajectories in different  
476 non-independent sets of mutations in the same system. In our simulations, we find that the  
477 average number of viable trajectories depends on the dimensionality of the model, with  
478 56% of the trajectories viable in the 2D-far regime and 58% in the 2D-close regime, while  
479 84% of the trajectories are viable in the 25D-far regime. The number of viable trajectories  
480 is also highly variable within a single parameter regime, as the standard deviation of the  
481 number of viable trajectories in the 2D-far regime is 40.3. Therefore, the variation in the  
482 number of viable trajectories observed between experimental systems could be caused  
483 either by differences in the adaptive landscape or the inherent variability between  
484 independent adaptive walks. Backward predictability inference needs to be conducted in a  
485 large number of independent adaptive trajectories in multiple systems to resolve these  
486 sources of variation.

487 We found that the presence of overdominant mutations also influences the results of  
488 backward predictability inference. Overdominant mutations significantly increase backward  
489 predictability in terms of the order of mutations, but consistently decrease backward  
490 predictability in terms of phenotype space. Our analysis also corroborates previous results  
491 which suggest that overdominant mutations decrease forward predictability in phenotype  
492 space (SELLIS *et al.* (2011), Figure S1). These results suggest that predictability can not  
493 be modeled as a scalar value, as different types of analysis give different results even in a

494 simple system like FGM.

495 Our analysis also uncovered qualitatively novel behaviors, such as the presence of hidden  
496 alleles. In particular, we found a small fraction of simulations where lack of knowledge of  
497 hidden alleles made it impossible to accurately infer the true trajectory using backward  
498 predictability inference. Therefore, in natural systems, there may be an unknown subset of  
499 adaptive trajectories where extinct hidden alleles would make it impossible to infer the true  
500 trajectory. Functionally important hidden alleles are challenging to identify even in extant  
501 populations, due to the vast amounts of variation present in any natural population.

502 As we are using a simulation system to carry out this study, there are a number of  
503 simplifications that we have made that will likely affect the accuracy of backward  
504 predictability inference in more realistic systems. These include alternative mechanisms by  
505 which adaptive mutations can be maintained as stable polymorphisms, including negative  
506 frequency dependent selection (LEVIN *et al.* 1988; ISERBYT *et al.* 2013), and spatially or  
507 temporally variable selection (RAINEY and TRAVISANO 1998; KASUMOVIC *et al.* 2008;  
508 SALTZ and NUZHIDIN 2014). Natural populations can also generate polymorphisms through  
509 a number of other mechanisms, such as clonal interference (DESAI and FISHER 2007;  
510 HERRON and DOEBELI 2013; KVITEK and SHERLOCK 2013; LANG *et al.* 2013), genetic  
511 drift, admixture and other demographic processes. While phenomena such as hidden  
512 mutations are likely universal to all of these processes, it is unclear whether the  
513 predictability of systems with stable polymorphic states depends on the mechanism that  
514 generates the polymorphisms.

515 The underlying genetic, phenotypic and fitness landscape models used in our simulations  
516 are also limited in a number of ways, and could be expanded by including the possibility of  
517 multiple adaptive optima within the model, multiple genetically unlinked loci that are

518 capable of adaptation, epistasis between multiple loci, the presence of standing genetic  
519 variation and genetic draft. Consideration of these processes will likely further complicate  
520 backward predictability inference. Finally, simulation systems have the advantage of  
521 having exact knowledge of the fitness landscape, so we can precisely measure the fitness of  
522 every genotype. This information must be estimated in natural systems, which may  
523 introduce significant noise during backward predictability inference.

524 Despite our use of a very simple model, we have shown that the successive fixation  
525 assumption has limited utility when attempting to predict evolution. Our simulations  
526 suggest that the FA method is only useful for identifying inviable mutation orders. In  
527 contrast, the PA method can both identify inviable mutation orders and accurately infer  
528 the likelihood of a mutation order. Since natural systems are substantially more complex  
529 than our model, we suggest that the successive fixation assumption should be used with  
530 great caution. Additional experiments are required to test whether the PA method is  
531 accurate in inferring the likelihood of a mutation order in biological systems, as well as  
532 additional theoretical studies to understand how alternative sources of polymorphisms and  
533 our other model assumptions affect the accuracy of the PA method, and more generally,  
534 the inference of the predictability of evolution.



## Literature Cited

- 535
- 536 ALBERT, A. Y. K., S. SAWAYA, T. H. VINES, A. K. KNECHT, C. T. MILLER, *et al.*,  
537 2008 The genetics of adaptive shape shift in stickleback: pleiotropy and effect size.  
538 *Evolution* **62**: 76–85.
- 539 BERGLAND, A., E. L. BEHRMAN, K. R. O'BRIEN, P. S. SCHMIDT, and D. A. PETROV,  
540 2014 Genomic evidence of rapid and stable adaptive oscillations over seasonal time scales  
541 in *Drosophila*. *PLoS Genetics* .
- 542 BERTELS, F., O. K. SILANDER, M. PACHKOV, P. B. RAINEY, and E. VAN NIMWEGEN,  
543 2014 Automated reconstruction of whole-genome phylogenies from short-sequence reads.  
544 *Molecular biology and evolution* **31**: 1077–88.
- 545 BRIDGHAM, J. T., S. M. CARROLL, and J. W. THORNTON, 2006 Evolution of  
546 hormone-receptor complexity by molecular exploitation. *Science (New York, N.Y.)* **312**:  
547 97–101.
- 548 BUENROSTRO, J. D., C. L. ARAYA, L. M. CHIRCUS, C. J. LAYTON, H. Y. CHANG,  
549 *et al.*, 2014 Quantitative analysis of RNA-protein interactions on a massively parallel  
550 array reveals biophysical and evolutionary landscapes. *Nature biotechnology* **32**: 562–8.
- 551 CROZAT, E., C. WINKWORTH, J. GAFFÉ, P. F. HALLIN, M. A. RILEY, *et al.*, 2010  
552 Parallel genetic and phenotypic evolution of DNA superhelicity in experimental  
553 populations of *Escherichia coli*. *Molecular Biology and Evolution* **27**: 2113–2128.
- 554 DE VISSER, J. A. G. M., and J. KRUG, 2014 Empirical fitness landscapes and the  
555 predictability of evolution. *Nature reviews. Genetics* **15**: 480–90.
- 556 DESAI, M. M., and D. S. FISHER, 2007 Beneficial mutation selection balance and the  
557 effect of linkage on positive selection. *Genetics* **176**: 1759–98.

- 558 DUDLEY, A. M., D. M. JANSE, A. TANAY, R. SHAMIR, and G. M. CHURCH, 2005 A  
559 global view of pleiotropy and phenotypically derived gene function in yeast. *Molecular*  
560 *systems biology* **1**: 2005.0001.
- 561 FISHER, R., 1930 *The genetical theory of natural selection*. Oxford at the Clarendon Press,  
562 Oxford, 1st edition.
- 563 FRANKE, J., A. KLOZER, J. A. G. M. DE VISSER, and J. KRUG, 2011 Evolutionary  
564 accessibility of mutational pathways. *PLoS Computational Biology* **7**.
- 565 GILLESPIE, J., 1983 A simple stochastic gene substitution model. *Theoretical Population*  
566 *Biology* **23**: 202–215.
- 567 GILLESPIE, J., 1984 Molecular evolution over the mutational landscape. *Evolution* **38**:  
568 1116–1129.
- 569 GOULD, S. J., 1990 *Wonderful Life: The Burgess Shale and the Nature of History*. W. W.  
570 Norton & Company.
- 571 HALL, B. G., 2006 Simple and accurate estimation of ancestral protein sequences.  
572 *Proceedings of the National Academy of Sciences of the United States of America* **103**:  
573 5431–6.
- 574 HARMS, M. J., and J. W. THORNTON, 2010 Analyzing protein structure and function  
575 using ancestral gene reconstruction. *Current Opinion in Structural Biology* **20**: 360–366.
- 576 HERRON, M. D., and M. DOEBELI, 2013 Parallel evolutionary dynamics of adaptive  
577 diversification in *Escherichia coli*. *PLoS Biology* **11**: e1001490.
- 578 ISERBYT, A., J. BOTS, H. VAN GOSSUM, and T. N. SHERRATT, 2013 Negative  
579 frequency-dependent selection or alternative reproductive tactics: maintenance of female  
580 polymorphism in natural populations. *BMC evolutionary biology* **13**: 139.

- 581 KASUMOVIC, M. M., M. J. BRUCE, M. C. B. ANDRADE, and M. E. HERBERSTEIN,  
582 2008 Spatial and temporal demographic variation drives within-season fluctuations in  
583 sexual selection. *Evolution* **62**: 2316–25.
- 584 KHAN, A. I., D. M. DINH, D. SCHNEIDER, R. E. LENSKI, and T. F. COOPER, 2011  
585 Negative epistasis between beneficial mutations in an evolving bacterial population.  
586 *Science* **332**: 1193–6.
- 587 KVITEK, D. J., and G. SHERLOCK, 2013 Whole genome, whole population sequencing  
588 reveals that loss of signaling networks is the major adaptive strategy in a constant  
589 environment. *PLoS Genetics* **9**: e1003972.
- 590 LANDE, R., 1976 Natural selection and random genetic drift in phenotypic evolution.  
591 *Evolution* **30**: 314–334.
- 592 LANG, G. I., D. P. RICE, M. J. HICKMAN, E. SODERGREN, G. M. WEINSTOCK, *et al.*,  
593 2013 Pervasive genetic hitchhiking and clonal interference in forty evolving yeast  
594 populations. *Nature* .
- 595 LEVIN, B. R., J. ANTONOVICS, and H. SHARMA, 1988 Frequency-dependent selection in  
596 bacterial populations. *Philosophical Transactions of the Royal Society B: Biological*  
597 *Sciences* **319**: 459–472.
- 598 LI, H., J. RUAN, and R. DURBIN, 2008 Mapping short DNA sequencing reads and calling  
599 variants using mapping quality scores. *Genome research* **18**: 1851–8.
- 600 LOBKOVSKY, A. E., Y. I. WOLF, and E. V. KOONIN, 2011 Predictability of evolutionary  
601 trajectories in fitness landscapes. *PLoS Computational Biology* **7**: e1002302.
- 602 MALCOLM, B., K. WILSON, and B. MATTHEWS, 1990 Ancestral lysozymes reconstructed,  
603 neutrality tested, and thermostability linked to hydrocarbon packing. *Nature* **345**:  
604 86–89.

- 605 MESSER, P. W., and D. A. PETROV, 2013 Frequent adaptation and the  
606 McDonald-Kreitman test. *Proceedings of the National Academy of Sciences* **2013**.
- 607 OGDEN, T. H., and M. S. ROSENBERG, 2006 Multiple sequence alignment accuracy and  
608 phylogenetic inference. *Systematic biology* **55**: 314–28.
- 609 ORR, H. A., 1999 The evolutionary genetics of adaptation: a simulation study. *Genetical*  
610 *Research* **74**: 207–14.
- 611 ORR, H. A., 2002 The population genetics of adaptation: the adaptation of DNA  
612 sequences. *Evolution* **56**: 1317–30.
- 613 ORR, H. A., 2005 The genetic theory of adaptation: a brief history. *Nature reviews.*  
614 *Genetics* **6**: 119–27.
- 615 ORTLUND, E. A., J. T. BRIDGHAM, M. R. REDINBO, and J. W. THORNTON, 2007  
616 Crystal structure of an ancient protein: evolution by conformational epistasis. *Science*  
617 (New York, N.Y.) **317**: 1544–8.
- 618 RAINEY, P., and M. TRAVISANO, 1998 Adaptive radiation in a heterogeneous  
619 environment. *Nature* **394**: 69–72.
- 620 SALTZ, J. B., and S. V. NUZHIDIN, 2014 Genetic variation in niche construction:  
621 implications for development and evolutionary genetics. *Trends in ecology & evolution*  
622 **29**: 8–14.
- 623 SELLIS, D., B. CALLAHAN, D. A. PETROV, and P. W. MESSER, 2011 Heterozygote  
624 advantage as a natural consequence of adaptation in diploids. *Proceedings of the*  
625 *National Academy of Sciences of the United States of America* **2011**: 1–6.
- 626 TAKAHATA, N., and M. NEI, 1990 Allelic genealogy under overdominant and  
627 frequency-dependent selection and polymorphism of major histocompatibility complex  
628 loci. *Genetics* **124**: 967–78.

629 THORNTON, J. W., 2004 Resurrecting ancient genes: experimental analysis of extinct  
630 molecules. *Nature reviews. Genetics* **5**: 366–75.

631 WEINREICH, D. M., N. F. DELANEY, M. A. DEPRISTO, and D. L. HARTL, 2006  
632 Darwinian evolution can follow only very few mutational paths to fitter proteins. *Science*  
633 **312**: 111–4.

634 WISER, M. J., N. RIBECK, and R. E. LENSKI, 2013 Long-term dynamics of adaptation  
635 in asexual populations. *Science (New York, N.Y.)* **1364**.

636 YANG, Z., S. KUMAR, and M. NEI, 1995 A new method of inference of ancestral  
637 nucleotide and amino acid sequences. *Genetics* **141**: 1641–1650.

638

## FIGURES

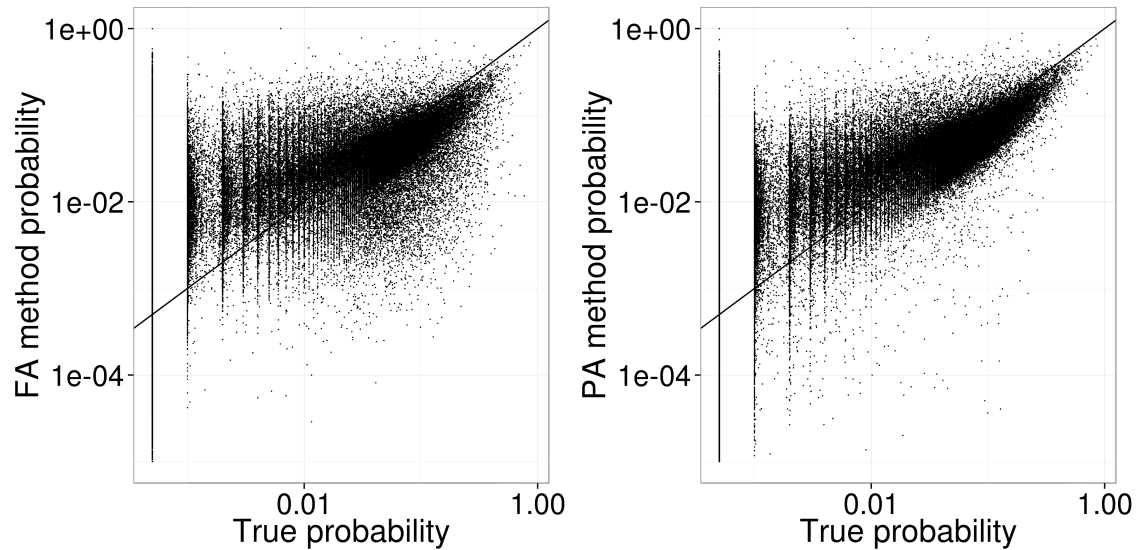

639

640 **Figure 1. Accuracy of inferred probabilities by the FA and PA methods.** We  
641 used 1000 replicate forward simulations to estimate the true probability of every viable  
642 path across all simulations to compare to the probabilities inferred by the (A) FA and (B)  
643 PA methods. The straight lines show  $y=x$ . The probabilities by both methods are  
644 significantly correlated with the true probability ( $r^2 = 0.53$ ,  $p < 10^{-10}$ ;  $r^2 = 0.67$ ,  $p < 10^{-10}$   
645 for FA and PA methods, respectively). The PA method is significantly better correlated  
646 than the FA method ( $p < 10^{-10}$ ).

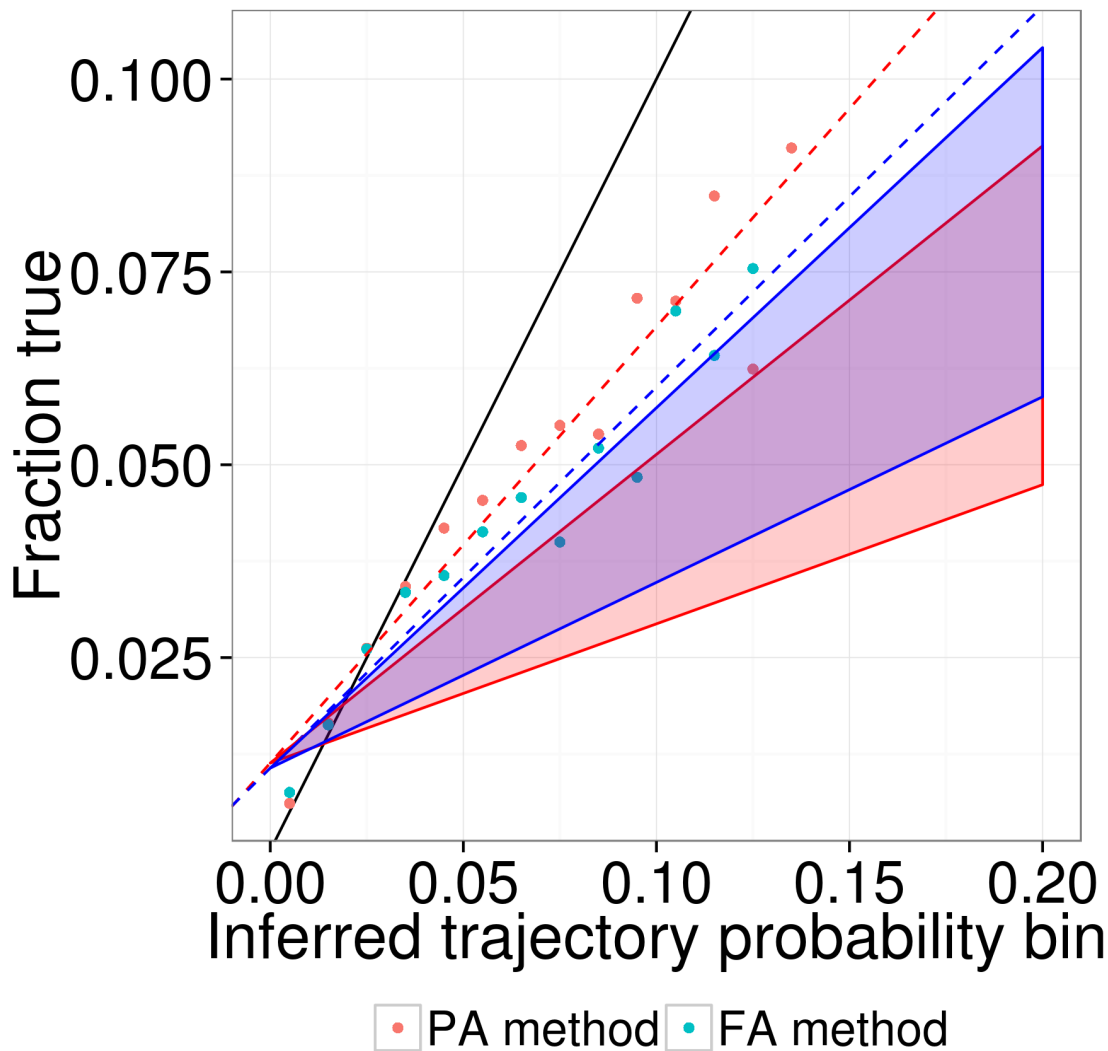

647

648 **Figure 2. Utility of the inferred trajectory probabilities of the FA (blue) and**  
649 **PA (red) methods in determining the true adaptive trajectory.** Dots are the  
650 probability of the inferred trajectories from the backward predictability inference binned  
651 into bins of width 1% against the fraction of the inferred trajectories in each bin that  
652 actually occurred in the underlying FGM simulation. Only bins containing at least 500  
653 trajectories are shown, with the regression lines shown as dashed lines of the appropriate  
654 color, and the  $y=x$  line shown in solid black. Shaded areas of the appropriate colors show  
655 the distribution of regression lines when a random viable trajectory is selected as the true  
656 trajectory. Both the FA and PA methods do better than all randomizations.

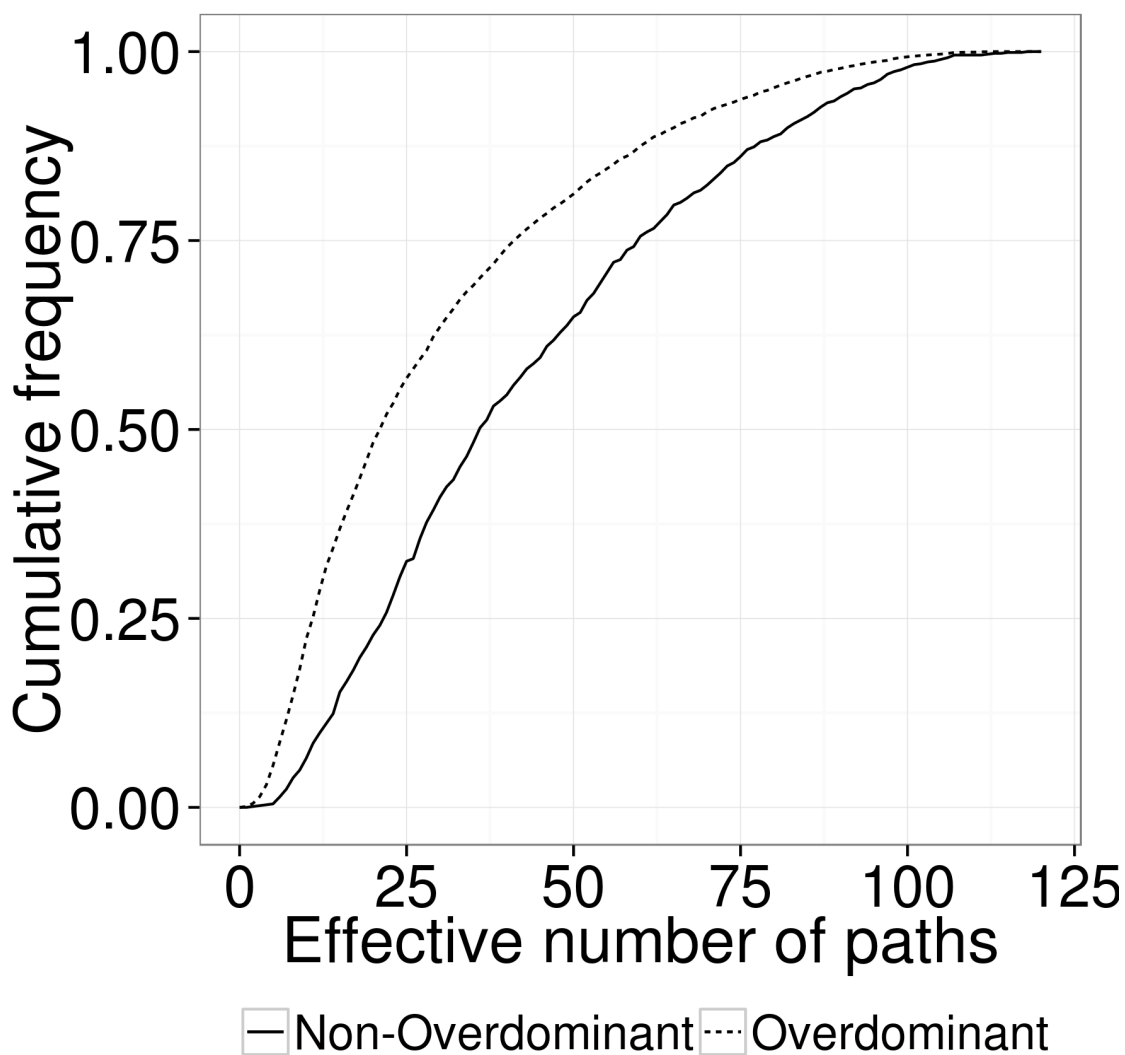

657

658 Figure 3. Cumulative distribution of the effective number of paths for adaptive walks with  
659 five mutations. This is a metric of backward predictability of evolution, which is computed  
660 as the inverse of the sum of the squared probabilities of the viable trajectories for that set  
661 of five mutations. A value of  $5! = 120$  means that every possible mutation order is viable  
662 and equally likely, while low values indicate the presence of only a few mutation orders  
663 with high likelihoods. The effective number of paths in simulations without overdominant  
664 mutations is significantly greater than in simulations with such mutations, suggesting that  
665 overdominant mutations increase backward predictability (Kolmogorov-Smirnov  $p < 10^{10}$ ).



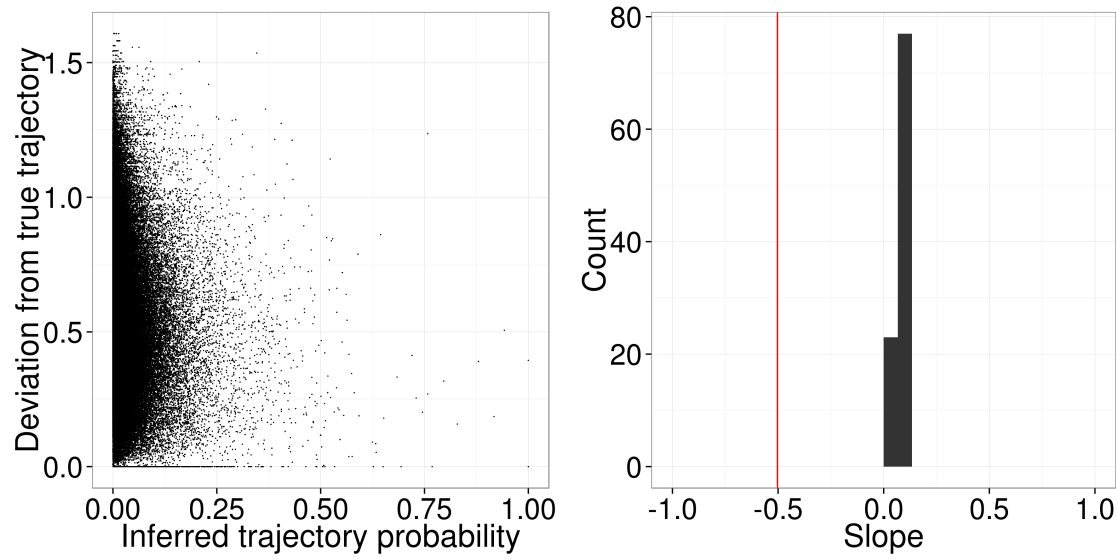

666

667 **Figure 4. (A)** Average phenotypic distance of inferred trajectories compared to the true  
668 trajectory. Linear regression slope =  $-0.50$ , t test of difference of slope from 0  $p < 10^{-10}$ .

669 **(B)** Comparison of empirical slope (vertical red line) to the slope distribution when  
670 randomly selecting the true trajectory and recomputing the deviation from this new “true”  
671 trajectory over 100 randomizations (empirical  $p < 0.01$ ).

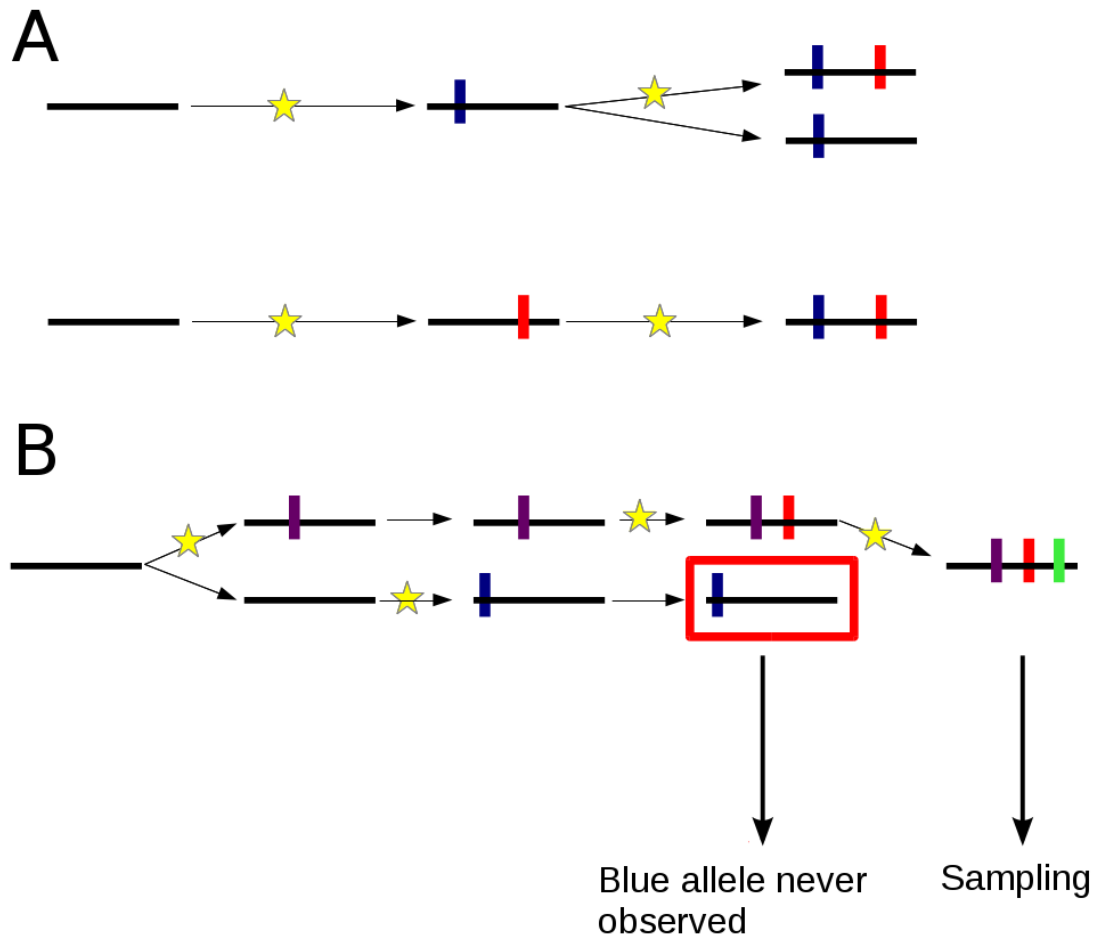

672

673 **Figure 5. Potential impact of polymorphism on adaptive trajectories.** Black  
674 horizontal lines represent alleles, while colored vertical bars represent mutated loci. Yellow  
675 stars show the occurrence of mutations. Time increases from left to right, and each set of  
676 arrows represents a transition from one population state to another through the process of  
677 a mutation successfully invading the population and reaching equilibrium. (A) Multiple  
678 Adapted States. A pair of mutations (red and blue) are introduced onto an ancestral  
679 genotype in different orders for backward predictability inference. In the first scenario  
680 (top), the blue mutation occurs first, with the second red mutation creating a balanced  
681 polymorphic state with the allele containing only the blue mutation. In the second scenario  
682 (bottom), the red mutation occurs first, and when the second blue mutation occurs, it fixes  
683 in the population. Therefore, the same mutations can result in different adapted  
684 population states when introduced in different orders. (B) Hidden Alleles. A four

685 mutation system is depicted, where the blue mutation creates a derived allele that occurred  
686 on a polymorphic state that was stably maintained for some time but subsequently lost. As  
687 sampling occurs after the loss of this allele, we call the allele with the blue mutation a  
688 hidden allele, as it is hidden from sampling. In some cases, the blue allele may have been  
689 necessary for the purple, red and green mutations to occur in the order that they did,  
690 resulting in a true adaptive trajectory that is impossible to reconstruct without knowledge  
691 of the hidden allele.
